# Supplementary material for: Hypothalamic deiodinase type-3 establishes the period of circannual interval timing in mammals
Source: eLife. 2026 Jan 13;14:RP106383. doi: 10.7554/eLife.106383 (PMC12799211; doi:10.7554/eLife.106383)
Supplement: Source data 5. [file elife-106383-data5.xlsx]

## Sheet: Datafile
This data file contains raw data underlying each figure
Exception is raw sequencing data which may be found at the associated GEO page
Contents
Fig 1b. - Raw Djungarian hamster pelage
Fig 1c. - Raw Djungarian hamster body mass data
Fig 1d. - Raw Djungarian hamster food intake and adipose mass
Fig 1e. - Raw results of plasma GLP-1 western blot and plasma glucose
Fig 2b. - Raw Body mass of Djungarian hamster over 12 weeks of SP/LP
Fig 2c. - Raw Body mass of Djungarian hamster before and after food restriction
Fig 2d. - Sst qPCR results
Fig 2e. - Npy qPCR results
Fig 2f. - Prl qPCR results
Fig 2g. - Sst qPCR results
Fig 3b. - Raw body mass of Crispr-cas9 modified and wild type Djungarian hamsters
Fig 3e. - Body mass change after exposure to SP in SP and NR animals
Fig 3f. - Dio3 expression after exposure to SP in SP and NR animals
Fig S1a. - Plasma insulin in Djungarian hamsters
Fig S1b. - Dio3 qPCR results across interval time
Fig1 fs1c. - Sst qPCR results across interval time
Fig2 fs1a. - Epidydimal adipose tissue mass
Fig2 fs1b. - Gh expression
Fig2 fs1c. - Plasma insulin
Fig3 fs1d. - Decomposition error
Fig3 fs1e. - Pelage

## Sheet: Fig 1b.
HAM ID	DL	Fur	HAM ID	DL	Fur	HAM ID	DL	Fur	HAM ID	DL	Fur	HAM ID	DL	Fur	HAM ID	DL	Fur	HAM ID	DL	Fur	HAM ID	DL	Fur	HAM ID	DL	Fur
125	LD	1	314	4wk	1	305	8wk	2	259	12wk	3	243	16wk	2	213	20wk	2	178	24wk	2	162	28wk	1	112	32wk	1
141	LD	1	315	4wk	1	306	8wk	2	260	12wk	3	244	16wk	3	214	20wk	2	180	24wk	2	163	28wk	1	113	32wk	1
142	LD	1	316	4wk	1	310	8wk	2	268	12wk	3	251	16wk	3	216	20wk	2	181	24wk	2	165	28wk	1	133	32wk	1
143	LD	1	332	4wk	1	325	8wk	2	275	12wk	3	252	16wk	3	217	20wk	3	185	24wk	2	172	28wk	1	134	32wk	1
194	LD	1	333	4wk	1	326	8wk	1	276	12wk	3	255	16wk	2	225	20wk	2	187	24wk	2	173	28wk	1	149	32wk	1
205	LD	1	350	4wk	1	330	8wk	1	277	12wk	3	256	16wk	3	226	20wk	3	188	24wk	2	174	28wk	2	152	32wk	1
209	LD	1	351	4wk	1	331	8wk	1	278	12wk	3	257	16wk	2	227	20wk	2	191	24wk	1	175	28wk	1	153	32wk	1
238	LD	1	352	4wk	1	396	8wk	1	279	12wk	3	264	16wk	3	228	20wk	2	196	24wk	2				159	32wk	1
239	LD	1	356	4wk	1	397	8wk	1	280	12wk	2	265	16wk	2	231	20wk	2	197	24wk	2				160	32wk	1
247	LD	1	357	4wk	1	398	8wk	1	288	12wk	2	271	16wk	3	232	20wk	2	198	24wk	2				161	32wk	1
248	LD	1	392	4wk	1	399	8wk	1	289	12wk	2	283	16wk	3	235	20wk	2
249	LD	1	393	4wk	1	400	8wk	2	292	12wk	3				236	20wk	2
417	LD	1
418	LD	1

## Sheet: Fig 1c.
HAM ID	DL	BW	HAM ID	DL	BW	HAM ID	DL	BW	HAM ID	DL	BW	HAM ID	DL	BW	HAM ID	DL	BW	HAM ID	DL	BW	HAM ID	DL	BW	HAM ID	DL	BW
125	LD	45.6	314	4wk	38.6	305	8wk	31.8	259	12wk	36.4	243	16wk	39	213	20wk	35.8	178	24wk	38.3	162	28wk	42.2	112	32wk	57.5
141	LD	48.8	315	4wk	41.5	306	8wk	34.8	260	12wk	34.1	244	16wk	31.2	214	20wk	35.8	180	24wk	37.7	163	28wk	44.5	113	32wk	44.4
142	LD	44.8	316	4wk	36.9	310	8wk	41.3	268	12wk	34.3	251	16wk	39.2	216	20wk	36.5	181	24wk	41	165	28wk	44.4	133	32wk	45.4
143	LD	46.1	332	4wk	34.1	325	8wk	32.4	275	12wk	42.5	252	16wk	40.2	217	20wk	31.8	185	24wk	41.7	172	28wk	43.7	134	32wk	46.7
194	LD	49	333	4wk	37.5	326	8wk	37.1	276	12wk	35.6	255	16wk	31.4	225	20wk	29.7	187	24wk	47	173	28wk	48.8	149	32wk	40.7
205	LD	47	350	4wk	42.7	330	8wk	42.5	277	12wk	35	256	16wk	27.3	226	20wk	34.9	188	24wk	46.1	174	28wk	49.1	152	32wk	43.4
209	LD	43.5	351	4wk	37.2	331	8wk	43.7	278	12wk	37.7	257	16wk	31.6	227	20wk	32	191	24wk	49	175	28wk	45.7	153	32wk	46.6
238	LD	44.8	352	4wk	37.7	396	8wk	39.8	279	12wk	34	264	16wk	41.5	228	20wk	31.9	196	24wk	38.2				159	32wk	47.9
239	LD	41.8	356	4wk	35.6	397	8wk	41.7	280	12wk	40.8	265	16wk	42.4	231	20wk	37	197	24wk	37.9				160	32wk	51.8
247	LD	46.4	357	4wk	36.6	398	8wk	43.5	288	12wk	30.4	271	16wk	34	232	20wk	35.4	198	24wk	39.3				161	32wk	46.5
248	LD	43.6	392	4wk	33.7	399	8wk	38.4	289	12wk	32.7	283	16wk	33.3	235	20wk	42.9
249	LD	39.2	393	4wk	36.3	400	8wk	35.7	292	12wk	32.6				236	20wk	47.5
417	LD	40.3
418	LD	38.2

## Sheet: Fig 1d.
HAM ID	DL	WAT mass (g)	Food intake (g)	HAM ID	DL	WAT mass (g)	Food intake (g)	HAM ID	DL	WAT mass (g)	Food intake (g)	HAM ID	DL	WAT mass (g)	Food intake (g)	HAM ID	DL	WAT mass (g)	Food intake (g)	HAM ID	DL	WAT mass (g)	Food intake (g)	HAM ID	DL	WAT mass (g)	Food intake (g)	HAM ID	DL	WAT mass (g)	Food intake (g)	HAM ID	DL	WAT mass (g)	Food intake (g)
141	LD	0.514	4.06667	314	4wk	0.671	3.23333	305	8wk	0.247	2.73333	259	12wk	0.294	2.81667	251	16wk	0.219	3.28	213	20wk	0.202	3.8	178	24wk	0.279	5.1	162	28wk	0.234	2.5	112	32wk	0.634	5.3
142	LD	0.424	3.76667	315	4wk	0.688	3.23333	306	8wk	0.221	3.68333	260	12wk	0.149	2.95	252	16wk	0.185	2.18333	214	20wk	0.234	2.98333	180	24wk	0.34	5.36667	163	28wk	0.433	4.25	113	32wk	0.433	4.55
143	LD	0.534	3.7	316	4wk	0.54	2.63333	310	8wk	0.411	3.31667	268	12wk	0.15	3.26667	243	16wk	0.306	2.88333	216	20wk	0.268	3.66667	181	24wk	0.316	4.9	165	28wk	0.522	2.48333	133	32wk	0.671	4.18333
205	LD	0.491	4.23333	332	4wk	0.43	3.28333	325	8wk	0.275	2.98333	275	12wk	0.169	4.03333	244	16wk	0.163	2.16667	217	20wk	0.191	3.95	185	24wk	0.377	5.2	172	28wk	0.45	4.25	134	32wk	0.494	3.98333
247	LD	0.661	4.35	333	4wk	0.743	2.71667	326	8wk	0.427	3	276	12wk	0.163	3.33333	255	16wk	0.185	4.76667	225	20wk	0.236	3.58333	187	24wk	0.449	4.18333	173	28wk	0.591	4.4	149	32wk	0.808	4.65
248	LD	0.587	3.68333	350	4wk	0.677	4.61667	330	8wk	0.632	4.36667	277	12wk	0.094	3.3	256	16wk	0.137	3.55	226	20wk	0.319	3.46667	188	24wk	0.518	4.01667	174	28wk	0.753	3.73333	152	32wk	0.572	4.48333
249	LD	0.512	3.9	351	4wk	0.465	4.13333	331	8wk	0.621	3.76667	278	12wk	0.132	4.31667	257	16wk	0.126	3.26667	227	20wk	0.238	3.81667	191	24wk	0.6	3.11667	175	28wk	0.647	4.48333	153	32wk	0.881	3.61667
194	LD	0.647	4.65	352	4wk	0.583	2.96667	396	8wk	0.242	3.81667	279	12wk	0.13	3.65	264	16wk	0.267	2.95	228	20wk	0.166	3.06667	196	24wk	0.236	3.63333					159	32wk	0.773	5.35
238	LD	0.465	5.11667	356	4wk	0.504	3.18333	397	8wk	0.368	3.33333	280	12wk	0.378	3	265	16wk	0.357	5	231	20wk	0.303	4.76667	197	24wk	0.283	3.33333					160	32wk	1	5.4
239	LD	0.553	3.95	357	4wk	0.5	3.33333	398	8wk	0.465	2.75	288	12wk	0.292	2.18333	271	16wk	0.102	4.53333	232	20wk	0.199	4.23333	198	24wk	0.224	3.61667					161	32wk	0.756	4.95
209	LD	0.633	4.6	392	4wk	0.6	2.96667	399	8wk	0.278	3.51667	289	12wk	0.167	2.88333	283	16wk	0.224	4.31667	235	20wk	0.4	4.35
125	LD	0.505	5.28333	393	4wk	0.5	3.3	400	8wk	0.29	2.66667	292	12wk	0.138	3.88333					236	20wk	0.311	4.26667
417	LD	0.704	3.88333
418	LD	0.637	3.98333

## Sheet: Fig 1e. GLP
HAM ID	DL	GLP-1	HAM ID	DL	GLP-1	HAM ID	DL	GLP-1	HAM ID	DL	GLP-1	HAM ID	DL	GLP-1	HAM ID	DL	GLP-1	HAM ID	DL	GLP-1	HAM ID	DL	GLP-1	HAM ID	DL	GLP-1
142	LD	28.5	314	4 wk	29.9	305	8 wk	23.4	260	12 wk	30.1	251	16 wk	54.2	214	20 wk	31.3	178	24 wk	56.8	162	28 wk	65.8	151	32 wk	33.5
205	LD	30.8	316	4 wk	32.4	306	8 wk	66.8	276	12 wk	44.4	255	16 wk	48	216	20 wk	47.4	187	24 wk	38.5	163	28 wk	32.7	152	32 wk	22.1
238	LD	44.7	332	4 wk	25.6	325	8 wk	23.7	279	12 wk	44.1	256	16 wk	19.8	226	20 wk	37.6	188	24 wk	37.3	165	28 wk	19.4	153	32 wk	33.6
239	LD	28.5	333	4 wk	24.7	326	8 wk	47.6	280	12 wk	25.5	271	16 wk	28	227	20 wk	27.8	197	24 wk	35.9				160	32 wk	14.5
248	LD	29.6	352	4 wk	24.1	331	8 wk	27.9	289	12 wk	24.4				228	20 wk	24.5							161	32 wk	22.1
249	LD	30.7	392	4 wk	12.2	397	8 wk	34.3	292	12 wk	29				235	20 wk	11.6
418	LD	17.8

## Sheet: Fig 1e. Glu
HAM ID	DL	Glucose	HAM ID	DL	Glucose	HAM ID	DL	Glucose	HAM ID	DL	Glucose	HAM ID	DL	Glucose	HAM ID	DL	Glucose	HAM ID	DL	Glucose	HAM ID	DL	Glucose	HAM ID	DL	Glucose
141	LD	3.7	314	4wk	3.7	305	8wk	6.8	259	12wk	3.6	251	16wk	3.8	213	20wk	3.9	178	24wk	4.1	162	28wk	4.9	112	32wk	4.2
142	LD	3.7	315	4wk	4.1	306	8wk	3.1	260	12wk	3.3	252	16wk	4.4	214	20wk	4.1	180	24wk	4.7	163	28wk	4.1	113	32wk	4.1
143	LD	4.6	316	4wk	4.4	310	8wk	3.7	268	12wk	3.1	243	16wk	5	216	20wk	3.9	181	24wk	4.4	165	28wk	4.3	133	32wk	4.1
205	LD	3.7	332	4wk	4.6	325	8wk	3.7	275	12wk	3.9	244	16wk	4.5	217	20wk	4.3	185	24wk	4.2	172	28wk	3.9	134	32wk	4.8
247	LD	3.9	333	4wk	4.1	326	8wk	4.3	276	12wk	3.8	255	16wk	4.1	225	20wk	4.6	187	24wk	4.3	173	28wk	4.1	149	32wk	4.6
248	LD	3.7	350	4wk	3.7	330	8wk	3.2	277	12wk	2.9	256	16wk	4.4	226	20wk	4	188	24wk	3.8	174	28wk	4.1	152	32wk	4.6
249	LD	3.9	351	4wk	3.1	331	8wk	4.6	278	12wk	3.4	257	16wk	4.2	227	20wk	3.8	191	24wk	4.8	175	28wk	4.4	153	32wk	4.8
194	LD	3.9	352	4wk	4.6	396	8wk	3.3	279	12wk	3.4	264	16wk	4.4	228	20wk	3.8	196	24wk	4.3				159	32wk	4.8
238	LD	3.8	356	4wk	3.6	397	8wk	3.9	280	12wk	4.3	265	16wk	4.8	231	20wk	5	197	24wk	4				160	32wk	4.9
239	LD	4.3	357	4wk	4.1	398	8wk	3.5	288	12wk	3.7	271	16wk	3.9	232	20wk	4.7	198	24wk	4.4				161	32wk	4.4
209	LD	3.7	392	4wk	4.2	399	8wk	4.6	289	12wk	4.1	283	16wk	5.4	235	20wk	4.2
125	LD	4.7	393	4wk	5	400	8wk	3.9	292	12wk	3.9				236	20wk	5
417	LD	3.8
418	LD	4.7

## Sheet: Fig 2b.
ID	DL	FR/AL	Week 0	Week 2	Week 4	Week 6	Week 8	Week 10	Week 12
360	LD	AL	42.1	42.5	42.4	41.9	42.5	42.1	41.6
377	LD	AL	43.8	42.8	42.1	41.6	42.6	42.3	42.4
385	LD	AL	50.2	50.7	52	51.9	52.7	52.4	49
407	LD	AL	42.3	41.4	41.6	41.8	41.6	41.8	41.2
411	LD	AL	32.6	29.5	32	34.5	35.7	35.2	36
432	LD	AL	38.1	37.3	38.3	37.9	36.4	35.6	35
439	LD	AL	37	36.6	36.7	37.4	36.6	35.7	34.1
446	LD	AL	43.1	42	45.6	42.2	45.2	44.7	43.8
457	LD	AL	44	44.8	44.6	45.3	45.4	44.8	45.3
358	LD	FR	37.1	38.2	38.6	38.1	38.5	38.2	37.1
370	LD	FR	44.7	44.2	43.2	43	44.1	42.8	41.7
383	LD	FR	48.6	47.1	49	48	49.7	48.9	46.9
402	LD	FR	37.8	33.5	36.9	37.6	37	36.4	36.2
409	LD	FR	44.6	46.1	46.2	45.2	45.5	44.6	44.3
416	LD	FR	49.8	47.2	48.8	48.9	49.5	50.2	52.8
437	LD	FR	38.9	39.8	39.8	39.5	39.2	38.4	39.8
444	LD	FR	47.1	46.7	47.9	48	47.4	47.2	48.4
451	LD	FR	45.3	44.1	45.5	45.2	44.9	44.9	43.6
369	SD	AL	51.4	47.9	45.6	41.8	39.6	38.6	38.3
378	SD	AL	42	39.3	38.4	36.4	35.5	34.5	35.1
401	SD	AL	45.1	40.3	39.5	38.4	38.2	36.7	35.6
408	SD	AL	39.3	37.9	35.6	32.4	33	33.6	33.2
415	SD	AL	47.5	45.7	43.5	41.2	39	38.6	38.5
433	SD	AL	37	35.4	36.5	32.5	32.4	29.8	32.3
443	SD	AL	46.2	44.2	42.5	42.8	41.1	39.5	39.2
450	SD	AL	41.9	40.4	39.6	36.7	34.6	32.9	32.9
458	SD	AL	32.7	32.1	31.1	30	31.6	31.2	33.1
359	SD	FR	43.9	44.1	45.2	44.8	41.7	39.4	37.8
384	SD	FR	44	43	41.5	42.5	41.2	40.6	43.1
406	SD	FR	43.1	39.2	38.1	37.9	35.8	36.3	38.5
410	SD	FR	40.8	37.8	32.3	33.3	35	35.2	37.3
431	SD	FR	35.7	34.3	33	30.5	28.2	26.5	27.8
438	SD	FR	37.1	36.2	35.9	35.8	35	34	35.2
445	SD	FR	42.7	40.1	38.5	37.8	34.8	33.5	33.4
456	SD	FR	43.7	41.3	39.3	36.4	37.2	36.3	35.6

## Sheet: Fig 2c.
Ham ID	FR	DL	Pre	Post	Dif
360	AL	LD	41	41.2	0.2
377	AL	LD	41.5	40.6	-0.9
385	AL	LD	48.9	49.5	0.6
407	AL	LD	39.8	41.3	1.5
411	AL	LD	36.3	36.7	0.4
432	AL	LD	34.2	34.4	0.2
439	AL	LD	34.7	34.5	-0.2
446	AL	LD	43.7	44.3	0.6
457	AL	LD	45.3	45.5	0.2
369	AL	SD	36.5	36.6	0.1
378	AL	SD	34.2	35.3	1.1
401	AL	SD	35.3	35.3	0
408	AL	SD	33.2	32.6	-0.6
415	AL	SD	37.8	37.3	-0.5
433	AL	SD	31.2	31.7	0.5
443	AL	SD	38.2	39.2	1
450	AL	SD	31.9	31.6	-0.3
458	AL	SD	32.8	33	0.2
358	FR	LD	37.2	36.1	-1.1
370	FR	LD	40.6	39.2	-1.4
383	FR	LD	47.3	45.7	-1.6
402	FR	LD	35.6	33.9	-1.7
409	FR	LD	44.3	44.5	0.2
416	FR	LD	53	51.3	-1.7
437	FR	LD	39.5	37.9	-1.6
444	FR	LD	47.3	46	-1.3
451	FR	LD	42.9	41.7	-1.2
359	FR	SD	36.8	35.3	-1.5
384	FR	SD	41.8	39.6	-2.2
406	FR	SD	36.9	35.6	-1.3
410	FR	SD	37.3	37.5	0.2
431	FR	SD	27.2	25.4	-1.8
438	FR	SD	34.7	33.2	-1.5
445	FR	SD	33	31.6	-1.4
456	FR	SD	34.3	33.3	-1

## Sheet: Fig 2d.
Ham ID	Group	Sst LogFold
360	LDAL	0.28972
377	LDAL	0.220701
385	LDAL	3.33692
407	LDAL	0.946479
411	LDAL	--
432	LDAL	4.95176
369	SDAL	0.949104
378	SDAL	--
401	SDAL	53.7976
408	SDAL	17.9427
415	SDAL	4.74068
433	SDAL	2.98586
358	LDFR	--
370	LDFR	5.83933
383	LDFR	--
402	LDFR	1.61663
416	LDFR	4.42337
437	LDFR	6.92898
359	SDFR	13.8267
384	SDFR	62.9198
406	SDFR	18.3337
431	SDFR	1.47872
438	SDFR	--
445	SDFR	7.73158

## Sheet: Fig 2e.
Ham ID	Group	Npy LogFold
360	LDAL	0.507765
377	LDAL	0.124056
385	LDAL	2.06668
407	LDAL	6.21495
411	LDAL	--
432	LDAL	1.23597
369	SDAL	2.67018
378	SDAL	--
401	SDAL	1.81752
408	SDAL	9.62525
415	SDAL	4.76671
433	SDAL	1.49832
358	LDFR	--
370	LDFR	6.79938
383	LDFR	--
402	LDFR	3.8933
416	LDFR	5.24138
437	LDFR	14.7858
359	SDFR	42.8252
384	SDFR	12.3013
406	SDFR	8.79039
431	SDFR	0.691765
438	SDFR	--
445	SDFR	5.62387

[truncated: 14 more sheets: Fig 2f., Fig 2g., Fig 3b., Fig 3d., Fig 3e., Fig 3f., Fig1 fs1a., Fig1 fs1b., Fig1 fs1c., Fig2 fs1a., Fig2 fs1b., Fig2 fs1c., Fig3 fs1d, Fig3 fs1e]
